# Supplementary material for: Facile synthesis and excellent electrochemical properties of CoMoO4 nanoplate arrays as supercapacitors
Source: Royal Society of Chemistry journal article supplement (doi:10.1039/c3ta10909g), 2013-01-01
Supplement: c3ta10909g.pdf [file c3ta10909g.pdf]

Electronic Supplementary Material

**Facile synthesis and excellent electrochemical properties of CoMoO<sub>4</sub> nanoplate arrays for supercapacitors**

Di Guo, Haiming Zhang, Xinzhi Yu, Ming Zhang, Ping Zhang, QiuHong Li\* and Taihong Wang\*\*

*Key Laboratory for Micro-Nano Optoelectronic Devices of Ministry of Education,  
and State Key Laboratory for Chemo/Biosensing and Chemometrics, Hunan  
University, Changsha, 410082, P. R. China.*

\*E-mail: [liqiuHong2004@hotmail.com](mailto:liqiuHong2004@hotmail.com) (Q. H. Li); [thwang@iphy.ac.cn](mailto:thwang@iphy.ac.cn) (T. H. Wang);

Tel.: +86 0731 88664019; Fax: +86 0731 88822137.

Supplementary Figures

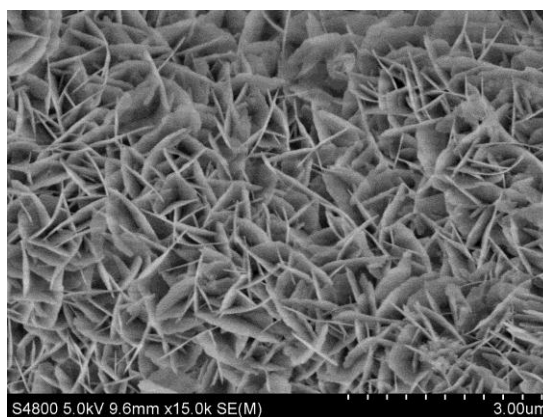

Fig. S1 SEM image of the as-synthesized CoMoO<sub>4</sub> precursor.

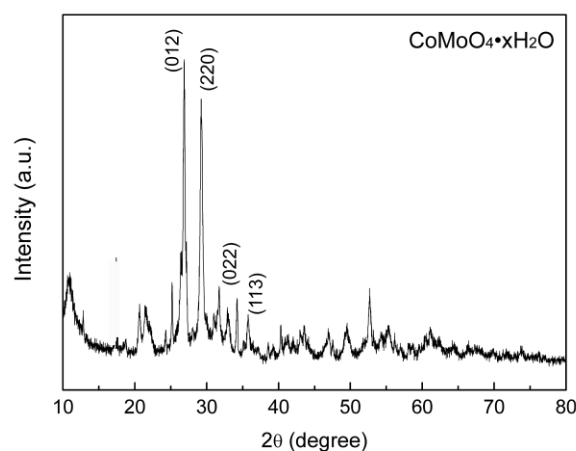

Fig. S2 XRD of the as-synthesized CoMoO<sub>4</sub> precursor.

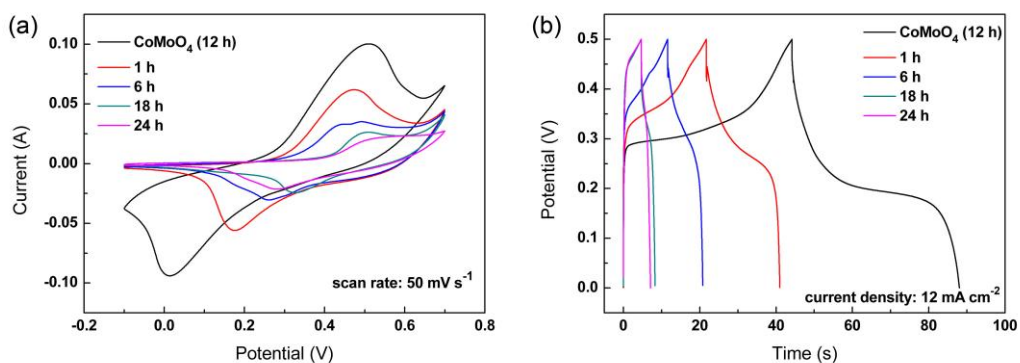

**Fig. S3** (a) Electrochemical performances of CoMoO<sub>4</sub> precursors obtained at 180°C at different times: 1 h, 6 h, 18 h and 24 h. (a) CV curves of CoMoO<sub>4</sub> precursors at 50 mV s<sup>-1</sup>. (b) Galvanostatic charge/discharge curves of the CoMoO<sub>4</sub> precursor electrodes at a current density of 12 mA cm<sup>-2</sup>.

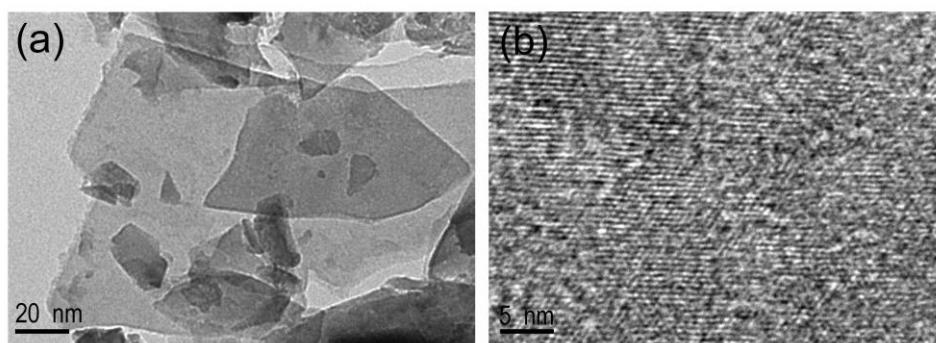

**Fig. S4** (a) TEM image of the CoMoO<sub>4</sub> NPs on Ni foam electrode after 4000 cycles. (b) High-resolution TEM image of the CoMoO<sub>4</sub> NP after cycling.
